# Supplementary material for: miRNA Signature in Mouse Spermatogonial Stem Cells Revealed by High-Throughput Sequencing
Source: Hindawi journal article supplement (doi:10.1155/2014/154251), 2014-01-01

**Table S1. Antibodies used in this research**

| <b>Antibody against</b>                           | <b>Antibody type</b>               | <b>Dilution</b> | <b>Source<br/>catalog number</b>      |
|---------------------------------------------------|------------------------------------|-----------------|---------------------------------------|
| GFR $\alpha$ 1                                    | Rabbit polyclonal<br>antibody IgG  | 1: 200          | Abcam (Cambridge, MA)<br>ab8026       |
| Texas Red (TR)-conjugated goat<br>anti-rabbit IgG | Goat polyclonal<br>antibody IgG    | 1:100           | Santa Cruz Biotechnologies<br>sc-2780 |
| Anti-Mouse MHC Class II (I-A/I-E) PE              | Rat monoclonal<br>antibody IgG2b   | 1:9             | eBioscience<br>12-5321-81             |
| Anti-Mouse CD45 PE                                | Rat monoclonal<br>antibody IgG2b   | 1:9             | eBioscience<br>12-0451-81             |
| Anti-Mouse CD11b PE                               | Rat monoclonal<br>antibody IgG2b   | 1:9             | eBioscience<br>12-0112-81             |
| Anti-mouse/human CD44 PE                          | Rat monoclonal<br>antibody IgG2b   | 1:9             | Biolegend<br>103007                   |
| Rat IgG2b K Isotype Control PE                    | Rat monoclonal<br>antibody IgG2b   | 1:9             | eBioscience<br>12-4031-81             |
| Anti-Mouse MHC Class I (H-2Db) PE                 | Mouse monoclonal<br>antibody IgG2a | 1:9             | eBioscience<br>12-5999-81             |
| Mouse IgG2a K Isotype Control PE                  | Mouse monoclonal<br>antibody IgG2a | 1:9             | eBioscience<br>12-4724-41             |

|                                |                               |     |                           |
|--------------------------------|-------------------------------|-----|---------------------------|
| Anti-Mouse Ly-6A/E (Sca-1) PE  | Rat monoclonal antibody IgG2a | 1:9 | eBioscience<br>12-5981-81 |
| Rat IgG2a K Isotype Control PE | Rat monoclonal antibody IgG2a | 1:9 | eBioscience<br>12-4321-41 |

**Table S2. PCR primers and conditions for gene expression analysis**

| Genes      | Primer sequences<br>(5'-3', Forward and Reverse)                | Annealing<br>temp | Length<br>(bp) | Accession No. |
|------------|-----------------------------------------------------------------|-------------------|----------------|---------------|
| GFRa1      | 5'TGGACAGGCAGGATGAAATAGAGC3'<br>5' TACTTGTGCCATTCAGTTCACCTTC 3' | 56                | 421            | NM_010279     |
| PLZF       | 5'CCATACTGGCACGGACAT3'<br>5' CTGTAGTGCGTCTCCAAC 3'              | 56                | 336            | NM_001033324  |
| E-cadherin | 5'GGCATTCCCTTGTTTCGGCTAT3'<br>5'AAAACATTGGTTGAGATAAG3'          | 56                | 394            | NM_009864     |
| NGN3       | 5'CTTCGCCCCACAACACTACATCT3'<br>5'TTTCCACTAGCACCCACCAC3'         | 56                | 308            | NM_009719     |
| LIN28      | 5'GGGACTCAACTCCTTAGCCT3'<br>5'AACAGGTAAGGATAAGCCAT3'            | 56                | 542            | NM_145833     |
| Oct4       | 5'GTATTCCCAACGAGAAGAGT3'<br>5'ATGATGAGTGACAGACAGGC3'            | 57                | 394            | NM_013633     |
| 18SRNA     | 5' GGTTCCCTTTGGTCGCTCGCT3'<br>5'GCTGCCTTCCTTGGATGTGG3'          | 58                | 364            | NM_145833     |

**Table S3. miRNAs highly expressed in mouse SSCs**

| <b>miRNAs</b>    | <b>ESCs</b> | <b>SSCs</b> | <b>MSCs</b> | <b>STs</b> | <b>GCs</b> |
|------------------|-------------|-------------|-------------|------------|------------|
| mmu-let-7g*      | 0.141       | 0.47        | 0           | 0.169      | 0          |
| mmu-miR-101b*    | 1.265       | 5.447       | 0.093       | 0.169      | 0.142      |
| mmu-miR-10a      | 589.36      | 8229.64     | 3607.16     | 3293.475   | 77.585     |
| mmu-miR-1195     | 7.241       | 31.928      | 0.093       | 0          | 0.142      |
| mmu-miR-129-2-3p | 6.468       | 28.454      | 12.011      | 1.742      | 0.142      |
| mmu-miR-146b     | 772.642     | 8203.159    | 303.343     | 1650.138   | 114.671    |
| mmu-miR-153      | 0.633       | 1.315       | 0           | 0.225      | 0.047      |
| mmu-miR-155      | 26.083      | 164.431     | 3.445       | 55.419     | 0.854      |
| mmu-miR-155*     | 0           | 1.503       | 0           | 0.112      | 0          |
| mmu-miR-184      | 134         | 537.242     | 0.652       | 20.684     | 226.212    |
| mmu-miR-190*     | 0.07        | 0.282       | 0           | 0          | 0          |
| mmu-miR-190b     | 1.898       | 5.447       | 0.931       | 0.843      | 0.427      |
| mmu-miR-1930     | 0.07        | 0.376       | 0.093       | 0          | 0.047      |
| mmu-miR-195      | 92.239      | 456.294     | 1.583       | 46.482     | 8.631      |
| mmu-miR-195*     | 0.562       | 12.396      | 0.186       | 0.393      | 0.047      |
| mmu-miR-196b     | 70.374      | 318.908     | 64.337      | 63.006     | 3.367      |
| mmu-miR-201*     | 0           | 0.094       | 0           | 0          | 0          |
| mmu-miR-203      | 173.792     | 1063.779    | 0.186       | 60.983     | 5.975      |
| mmu-miR-203*     | 0.352       | 3.756       | 0           | 0          | 0.047      |
| mmu-miR-215      | 3.234       | 31.271      | 1.862       | 4.215      | 0.285      |
| mmu-miR-216b     | 0           | 1.127       | 0.186       | 0          | 0          |
| mmu-miR-222*     | 4.078       | 21.974      | 10.428      | 5.621      | 0.142      |
| mmu-miR-224      | 14.623      | 72.872      | 20.763      | 14.726     | 0.379      |
| mmu-miR-26b*     | 0.773       | 2.817       | 0           | 0.281      | 0.047      |
| mmu-miR-297a*    | 10.616      | 27.233      | 1.024       | 0          | 0.047      |
| mmu-miR-297a-5*  | 1.758       | 5.447       | 0           | 0          | 0.142      |
| mmu-miR-297b-3p  | 10.616      | 27.233      | 5.307       | 0          | 0.047      |
| mmu-miR-297c     | 13.85       | 30.426      | 5.307       | 0.056      | 0.095      |
| mmu-miR-297c*    | 10.616      | 27.233      | 0.279       | 0          | 0.047      |
| mmu-miR-29c*     | 0.352       | 2.066       | 0.652       | 0.731      | 0.047      |
| mmu-miR-3065     | 0           | 0.376       | 0           | 0.112      | 0          |
| mmu-miR-3065*    | 0           | 0.188       | 0           | 0.056      | 0          |
| mmu-miR-3082-5p  | 0           | 0.094       | 0           | 0          | 0          |
| mmu-miR-3083     | 0           | 0.47        | 0           | 0.112      | 0          |
| mmu-miR-3084*    | 1.687       | 5.541       | 0.186       | 1.574      | 0.142      |
| mmu-miR-3086-3p  | 0           | 0.47        | 0.093       | 0          | 0          |
| mmu-miR-3096-3p  | 2.039       | 10.987      | 1.49        | 0.337      | 0.664      |
| mmu-miR-3096b-3p | 1.969       | 10.705      | 0           | 0.337      | 0.664      |
| mmu-miR-30b      | 66.297      | 356.471     | 10.521      | 103.137    | 7.967      |

|                   |         |          |        |         |         |
|-------------------|---------|----------|--------|---------|---------|
| mmu-miR-30c       | 274.397 | 760.741  | 20.949 | 252.588 | 22.621  |
| mmu-miR-31*       | 4.921   | 46.86    | 11.08  | 0.955   | 0.427   |
| mmu-miR-3102-3p.2 | 0       | 0.282    | 0.093  | 0.112   | 0       |
| mmu-miR-3105-3p   | 0.07    | 0.376    | 0      | 0       | 0       |
| mmu-miR-3105-5p   | 0.211   | 0.657    | 0      | 0       | 0       |
| mmu-miR-3107      | 5.554   | 47.799   | 5.586  | 1.63    | 2.988   |
| mmu-miR-3107*     | 0.07    | 4.695    | 0      | 0       | 0.095   |
| mmu-miR-339-5p    | 9.843   | 26.951   | 2.235  | 1.855   | 0.427   |
| mmu-miR-340-3p    | 4.71    | 24.698   | 0      | 3.934   | 0.427   |
| mmu-miR-340-5p    | 70.374  | 290.642  | 15.083 | 49.124  | 11.809  |
| mmu-miR-344       | 5.765   | 13.992   | 6.331  | 2.642   | 0.047   |
| mmu-miR-344d      | 0.844   | 1.784    | 0.466  | 0.506   | 0.047   |
| mmu-miR-346       | 0.281   | 2.348    | 0      | 0       | 0       |
| mmu-miR-346*      | 0       | 0.094    | 0      | 0       | 0       |
| mmu-miR-3470a     | 19.755  | 92.686   | 0.652  | 2.136   | 6.45    |
| mmu-miR-3470b     | 25.309  | 96.067   | 0.745  | 2.023   | 12.188  |
| mmu-miR-350*      | 0.773   | 2.535    | 0.372  | 0.169   | 0       |
| mmu-miR-3572      | 0       | 0.188    | 0      | 0.056   | 0       |
| mmu-miR-377       | 7.944   | 16.152   | 0.838  | 4.215   | 0       |
| mmu-miR-463       | 0.844   | 958.697  | 0      | 0.112   | 7.256   |
| mmu-miR-463*      | 0.422   | 457.327  | 0      | 0       | 2.419   |
|                   |         | 26396.15 |        |         |         |
| mmu-miR-465a-3p   | 71.288  | 2        | 0.093  | 2.304   | 178.741 |
| mmu-miR-465a-5p   | 9.561   | 7398.469 | 0      | 0.45    | 64.212  |
|                   |         | 26325.34 |        |         |         |
| mmu-miR-465b-3p   | 71.218  | 6        | 0.093  | 2.248   | 174.141 |
| mmu-miR-465c-3p   | 70.867  | 26171.15 | 0.093  | 2.248   | 173.287 |
| mmu-miR-465c-5p   | 15.889  | 8864.922 | 0      | 0.843   | 55.249  |
| mmu-miR-466a-3p   | 280.232 | 611.992  | 14.339 | 0.843   | 3.794   |
| mmu-miR-466b-3p   | 297.176 | 640.54   | 14.711 | 0.955   | 3.984   |
| mmu-miR-466c-3p   | 297.176 | 640.54   | 14.711 | 0.955   | 3.984   |
| mmu-miR-466e-3p   | 297.316 | 640.634  | 14.804 | 0.955   | 3.984   |
| mmu-miR-466j      | 0.07    | 0.657    | 0      | 0       | 0       |
| mmu-miR-466p-3p   | 296.191 | 640.165  | 14.618 | 0.955   | 3.984   |
| mmu-miR-466q      | 0       | 0.094    | 0      | 0       | 0       |
| mmu-miR-467e      | 42.534  | 103.58   | 19.459 | 0.45    | 0.854   |
| mmu-miR-470       | 28.122  | 19619.16 | 0      | 2.698   | 96.46   |
| mmu-miR-470*      | 0.07    | 115.787  | 0      | 0       | 0.996   |
| mmu-miR-471-3p    | 0       | 83.108   | 0      | 0       | 0.664   |
| mmu-miR-471-5p    | 0.281   | 206.22   | 0      | 0.056   | 2.703   |
| mmu-miR-483       | 2.953   | 14.18    | 0      | 0       | 0.047   |
| mmu-miR-483*      | 0.281   | 3.475    | 0      | 0       | 0.047   |
| mmu-miR-486       | 5.695   | 47.611   | 5.586  | 1.63    | 3.035   |

|                 |         |           |       |        |         |
|-----------------|---------|-----------|-------|--------|---------|
| mmu-miR-486*    | 0.422   | 21.786    | 1.583 | 0.562  | 0.19    |
| mmu-miR-497     | 13.217  | 38.408    | 4.376 | 5.789  | 0.664   |
| mmu-miR-497*    | 0.562   | 1.503     | 0     | 0.056  | 0.047   |
| mmu-miR-499*    | 0       | 0.094     | 0     | 0      | 0       |
| mmu-miR-5103    | 0.07    | 0.282     | 0     | 0      | 0       |
| mmu-miR-5106    | 0       | 0.188     | 0     | 0      | 0       |
| mmu-miR-511-3p  | 1.898   | 24.979    | 0     | 10.735 | 0.19    |
| mmu-miR-5121    | 1.898   | 5.071     | 0     | 0.112  | 0       |
| mmu-miR-547     | 0       | 0.282     | 0     | 0      | 0.047   |
| mmu-miR-592     | 0.422   | 2.442     | 0     | 0      | 0       |
| mmu-miR-664     | 0.703   | 7.7       | 1.49  | 3.71   | 0.047   |
| mmu-miR-668     | 2.039   | 4.226     | 0.093 | 1.967  | 0       |
| mmu-miR-669c*   | 0.211   | 0.563     | 0.093 | 0      | 0       |
| mmu-miR-669i    | 0       | 0.188     | 0     | 0      | 0       |
| mmu-miR-669m-3p | 1.476   | 3.568     | 0.466 | 0      | 0       |
| mmu-miR-671-5p  | 18.701  | 43.009    | 0.745 | 16.187 | 0.379   |
| mmu-miR-674     | 13.92   | 32.304    | 5.866 | 3.991  | 0.379   |
| mmu-miR-678     | 0       | 0.094     | 0     | 0      | 0       |
| mmu-miR-680     | 0       | 0.094     | 0     | 0      | 0       |
| mmu-miR-682     | 0.07    | 0.188     | 0     | 0      | 0       |
| mmu-miR-684     | 0       | 0.188     | 0     | 0      | 0       |
| mmu-miR-692     | 0.141   | 1.784     | 0     | 0      | 0.047   |
| mmu-miR-741     | 16.381  | 15663.888 | 0     | 5.058  | 138.335 |
| mmu-miR-741*    | 0.562   | 154.008   | 0     | 0      | 1.612   |
| mmu-miR-742     | 0       | 24.51     | 0     | 0      | 0.332   |
| mmu-miR-742*    | 0       | 11.457    | 0     | 0      | 0       |
| mmu-miR-743a    | 3.867   | 8072.909  | 0     | 1.237  | 60.276  |
| mmu-miR-743a*   | 0.352   | 223.311   | 0     | 0      | 1.328   |
| mmu-miR-743b-3p | 1.969   | 1840.954  | 0     | 0.393  | 20.867  |
| mmu-miR-743b-5p | 0.07    | 77.379    | 0     | 0.056  | 0.427   |
| mmu-miR-871-3p  | 62.43   | 47916.648 | 0     | 7.194  | 296.589 |
| mmu-miR-871-5p  | 0.844   | 1991.769  | 0     | 0.056  | 14.607  |
| mmu-miR-872*    | 124.016 | 277.683   | 14.99 | 28.777 | 1.66    |
| mmu-miR-873     | 0.07    | 4.508     | 0.186 | 0.056  | 0.047   |
| mmu-miR-873*    | 0       | 0.094     | 0     | 0      | 0       |
| mmu-miR-875-5p  | 0       | 0.094     | 0     | 0      | 0       |
| mmu-miR-878-3p  | 2.109   | 1298.547  | 0     | 0.169  | 7.351   |
| mmu-miR-878-5p  | 83.803  | 20216.409 | 0     | 5.002  | 137.15  |
| mmu-miR-879     | 0.352   | 0.939     | 0     | 0.056  | 0.047   |
| mmu-miR-879*    | 0       | 0.188     | 0     | 0      | 0       |

|                 |        |          |   |       |        |
|-----------------|--------|----------|---|-------|--------|
| mmu-miR-880     | 17.646 | 9533.634 | 0 | 1.405 | 60.94  |
| mmu-miR-880*    | 0      | 0.094    | 0 | 0     | 0      |
| mmu-miR-881     | 8.507  | 5107.887 | 0 | 1.405 | 52.403 |
| mmu-miR-881*    | 0.422  | 236.646  | 0 | 0.056 | 1.802  |
| mmu-miR-883a-3p | 0.211  | 424.46   | 0 | 0     | 3.557  |
| mmu-miR-883a-5p | 0.07   | 141.424  | 0 | 0     | 0.854  |
| mmu-miR-883b-3p | 0      | 100.574  | 0 | 0     | 0.569  |
| mmu-miR-883b-5p | 0.07   | 240.684  | 0 | 0     | 1.565  |

**Table S5. endogenous retrovirus 1,2,3-derived repeats for piRNAs increased in developing GCs**

| ESC           |                      | SSC                 |                      | GCs                 |                      |
|---------------|----------------------|---------------------|----------------------|---------------------|----------------------|
| Repeats       | Relative Frequency % | Repeats             | Relative Frequency % | Repeats             | Relative Frequency % |
| DNAtransposon | 9.62                 | CR1                 | 15.61                | CR1                 | 8.88                 |
| ERV3          | 0.34                 | DNAtransposon       | 2.06                 | DNAtransposon       | 1.08                 |
| Pseudogene    | 86.63                | ERV1                | 1.07                 | ERV1                | 0.73                 |
| SINE1/7SL     | 7.17                 | ERV2                | 1.88                 | ERV2                | 2.72                 |
| rRNA          | 0.72                 | ERV3                | 26.26                | ERV3                | 48.60                |
| tRNA          | 5.05                 | L1                  | 2.27                 | Gypsy               | 0.00                 |
|               |                      | Mariner/Tc1         | 0.18                 | L1                  | 2.56                 |
|               |                      | Pseudogene          | 22.09                | Mariner/Tc1         | 0.17                 |
|               |                      | RMER1A              | 0.01                 | Pseudogene          | 0.00                 |
|               |                      | RTEX                | 0.72                 | RMER1A              | 0.00                 |
|               |                      | SINE                | 7.04                 | RTEX                | 1.74                 |
|               |                      | SINE1/7SL           | 8.09                 | SINE                | 9.91                 |
|               |                      | SINE2/tRNA          | 8.75                 | SINE1/7SL           | 9.50                 |
|               |                      | Satellite           | 0.04                 | SINE2/tRNA          | 9.25                 |
|               |                      | SimpleRepeat        | 0.61                 | Satellite           | 0.04                 |
|               |                      | TransposableElement | 0.04                 | SimpleRepeat        | 0.72                 |
|               |                      | hAT                 | 2.50                 | TransposableElement | 0.01                 |
|               |                      | rRNA                | 0.04                 | hAT                 | 3.71                 |
|               |                      | snRNA               | 0.29                 | rRNA                | 0.01                 |
|               |                      | tRNA                | 0.45                 | snRNA               | 0.37                 |



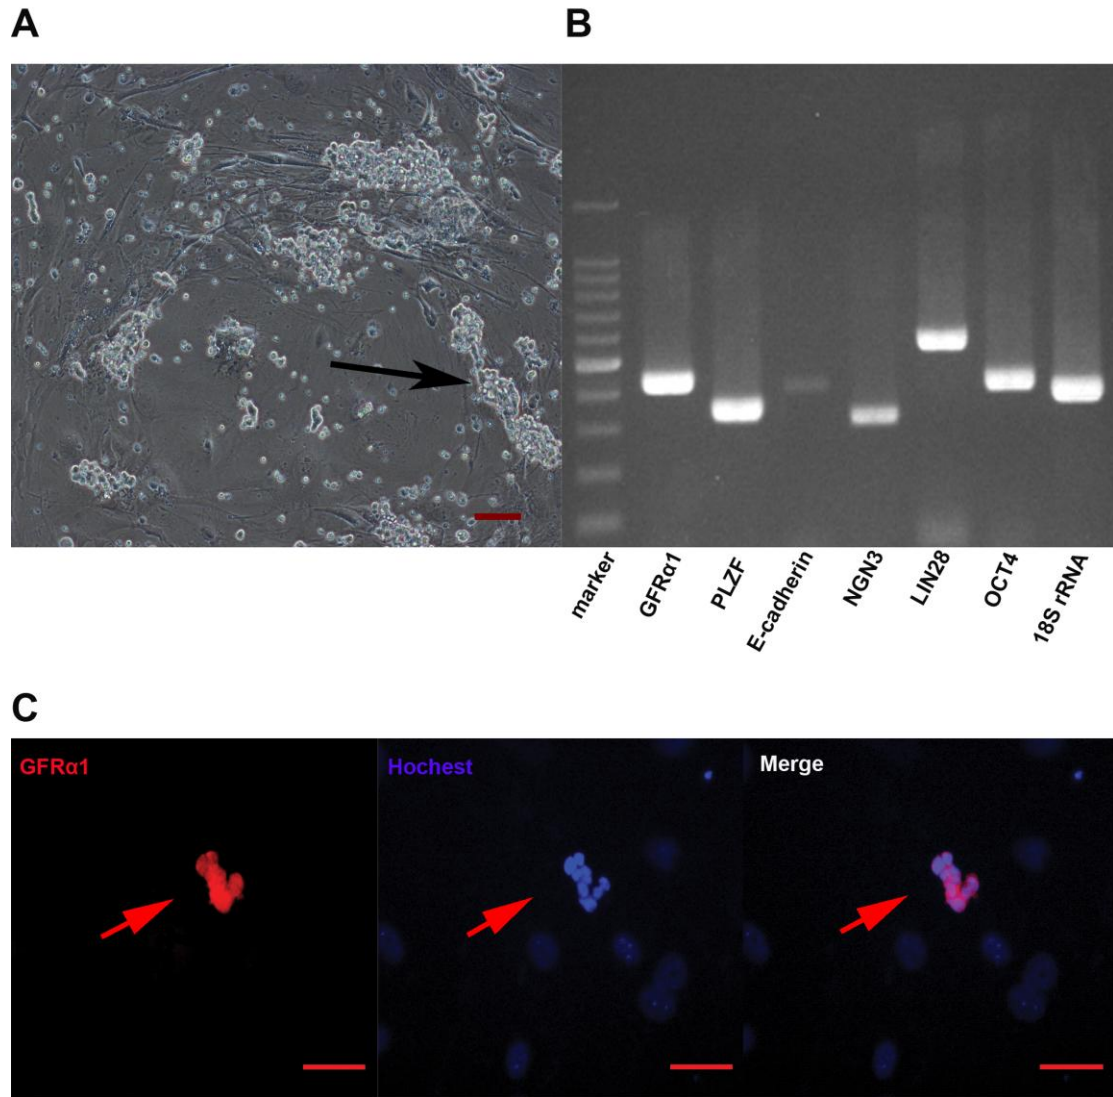

Figure S1

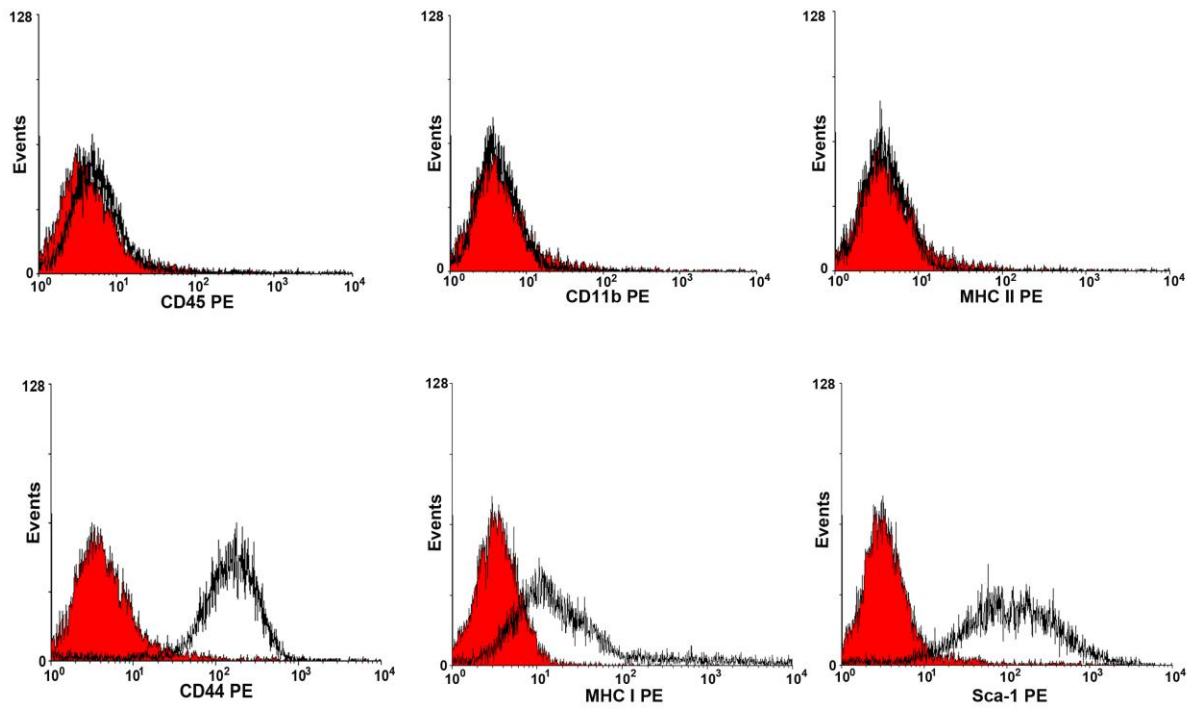

Figure S2

Figure S3

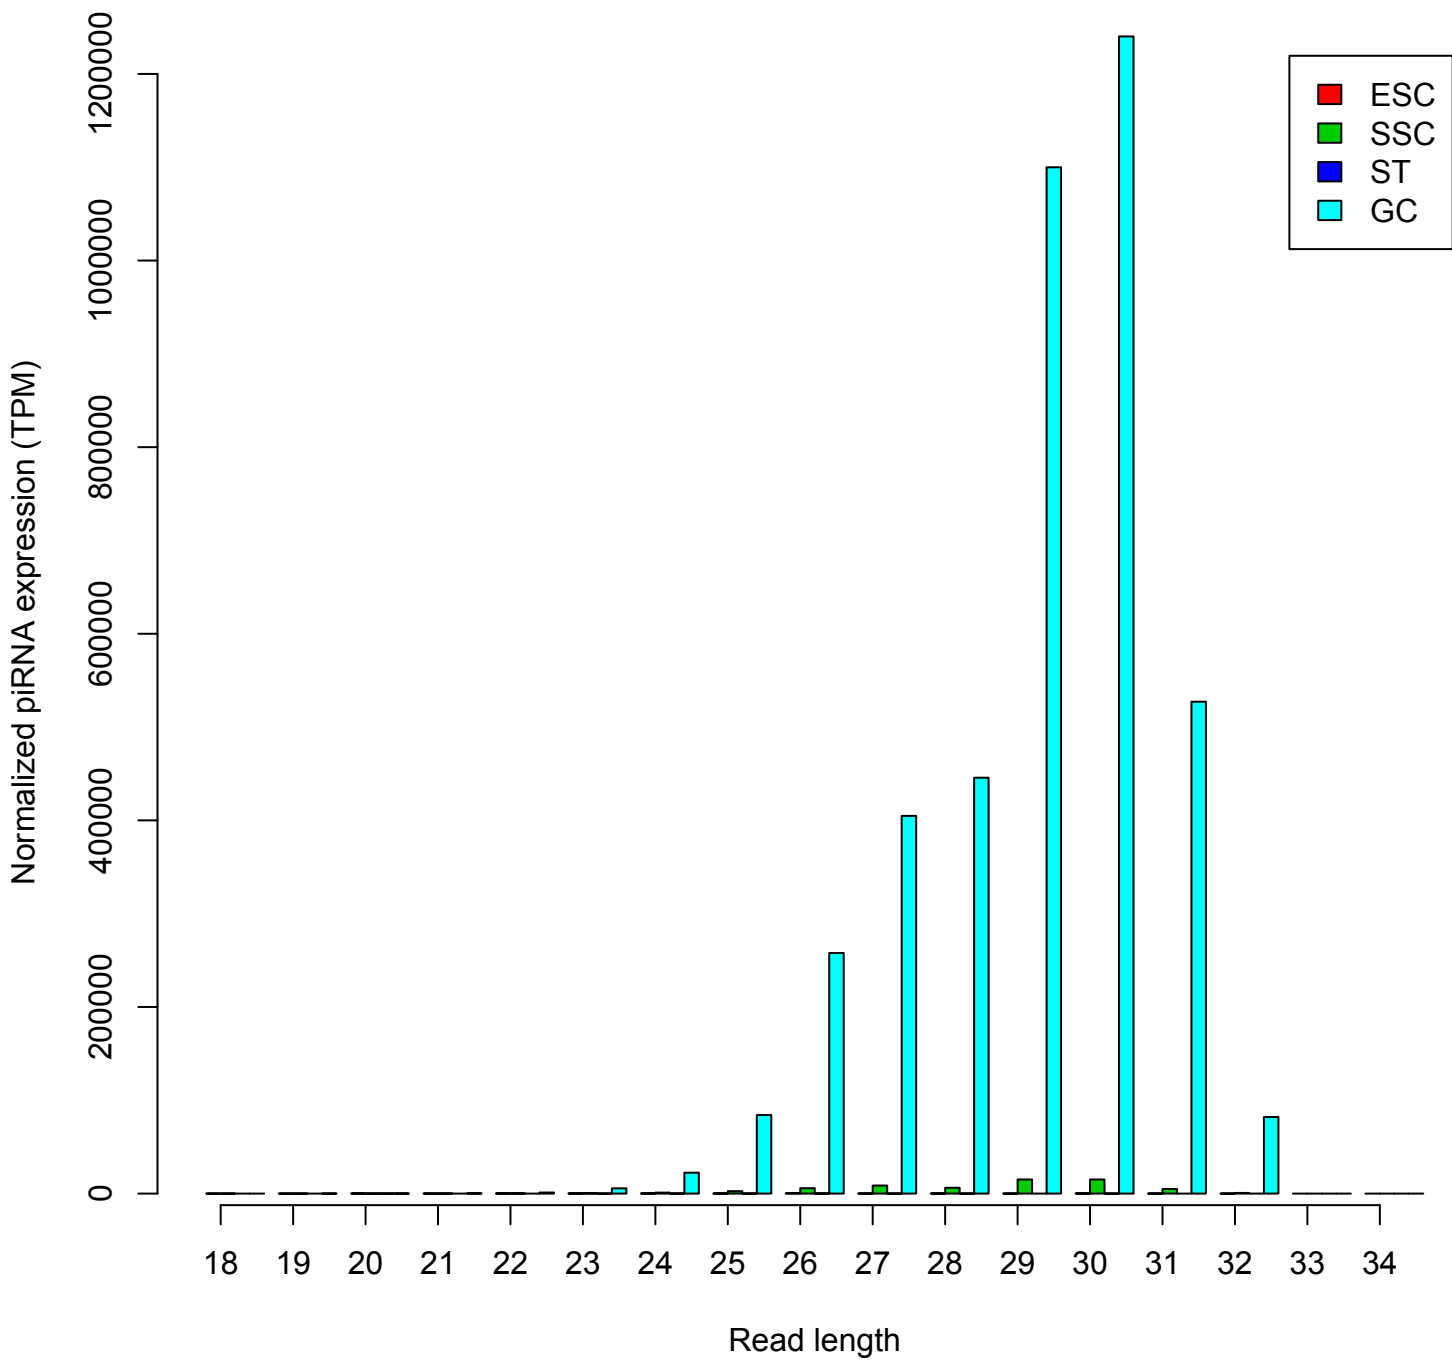

Supplement: f1 [file 154251.f1.pdf]
